# Supplementary figures and images for: The vacuole/lysosome is required for cell-cycle progression
Source: eLife journal article supplement (doi:10.7554/elife.08160), 2015-08-31

Figure 2-figure supplement 2, Jin and Weisman

(A)

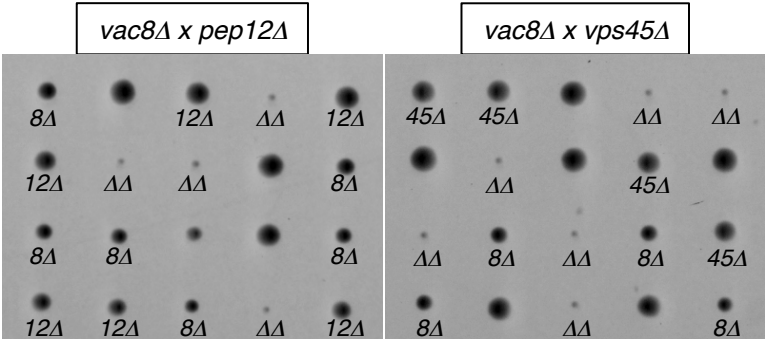

(B)

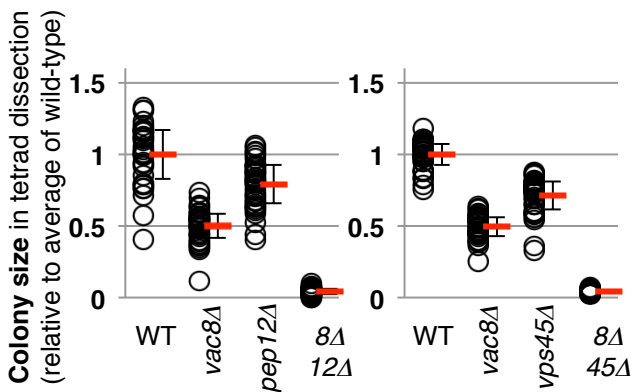

(C)

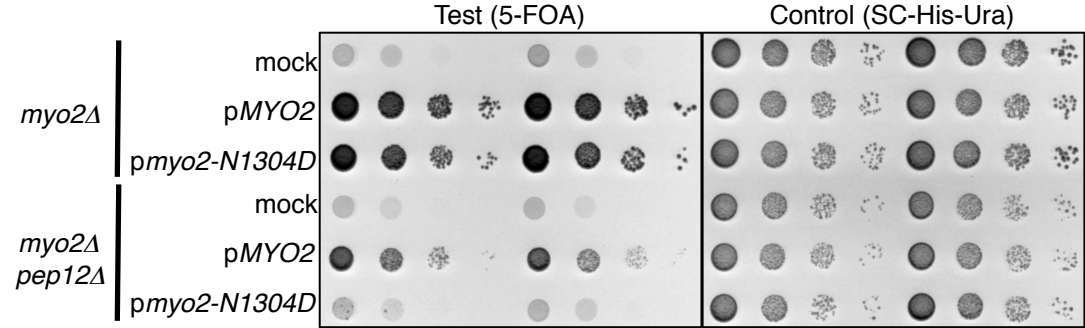

(D)

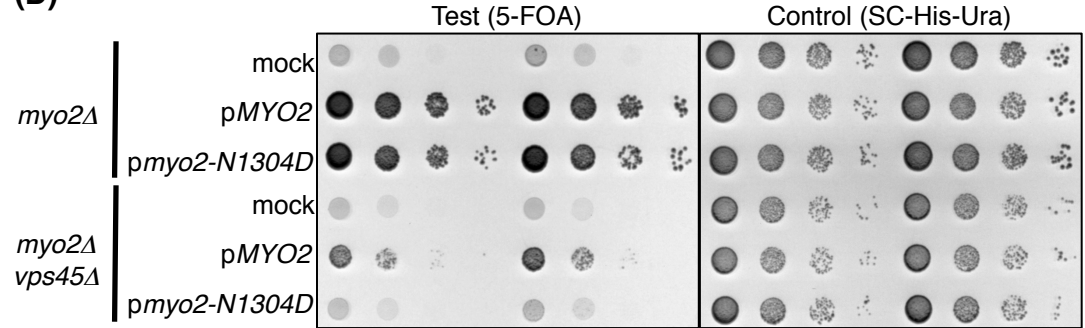

Supplement: supp [file elife-08160-supp-v1.zip]

Figure 4-figure supplement 4, Jin and Weisman

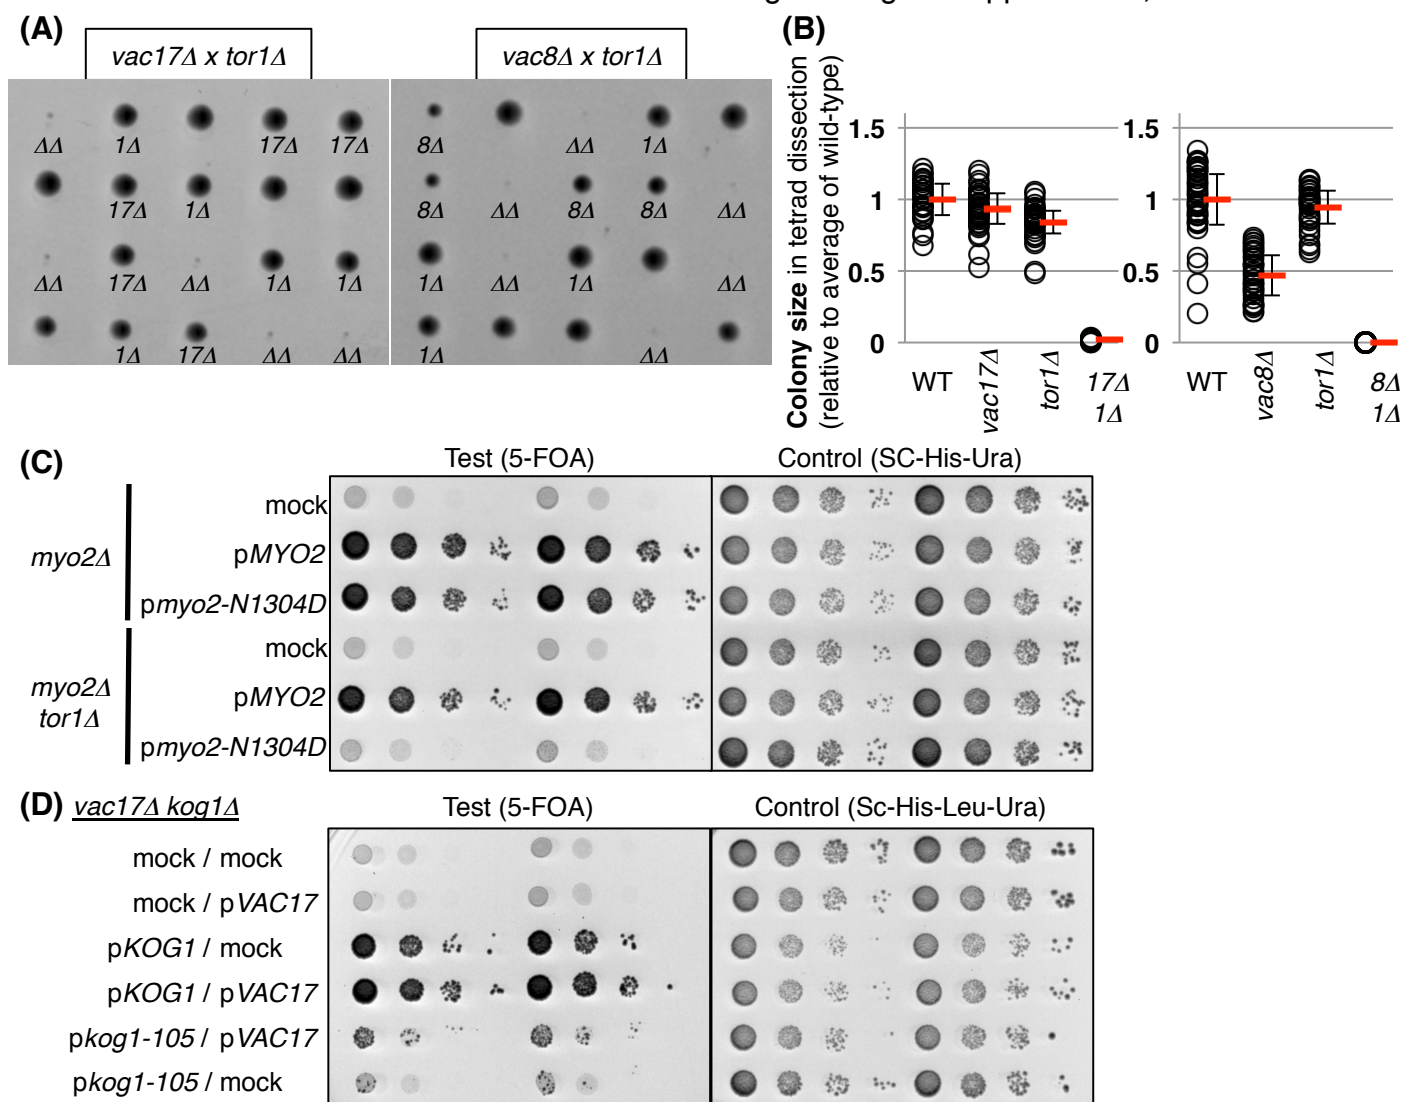

Supplement: supp [file elife-08160-supp-v1.zip]

Figure 1-figure supplement 1, Jin and Weisman

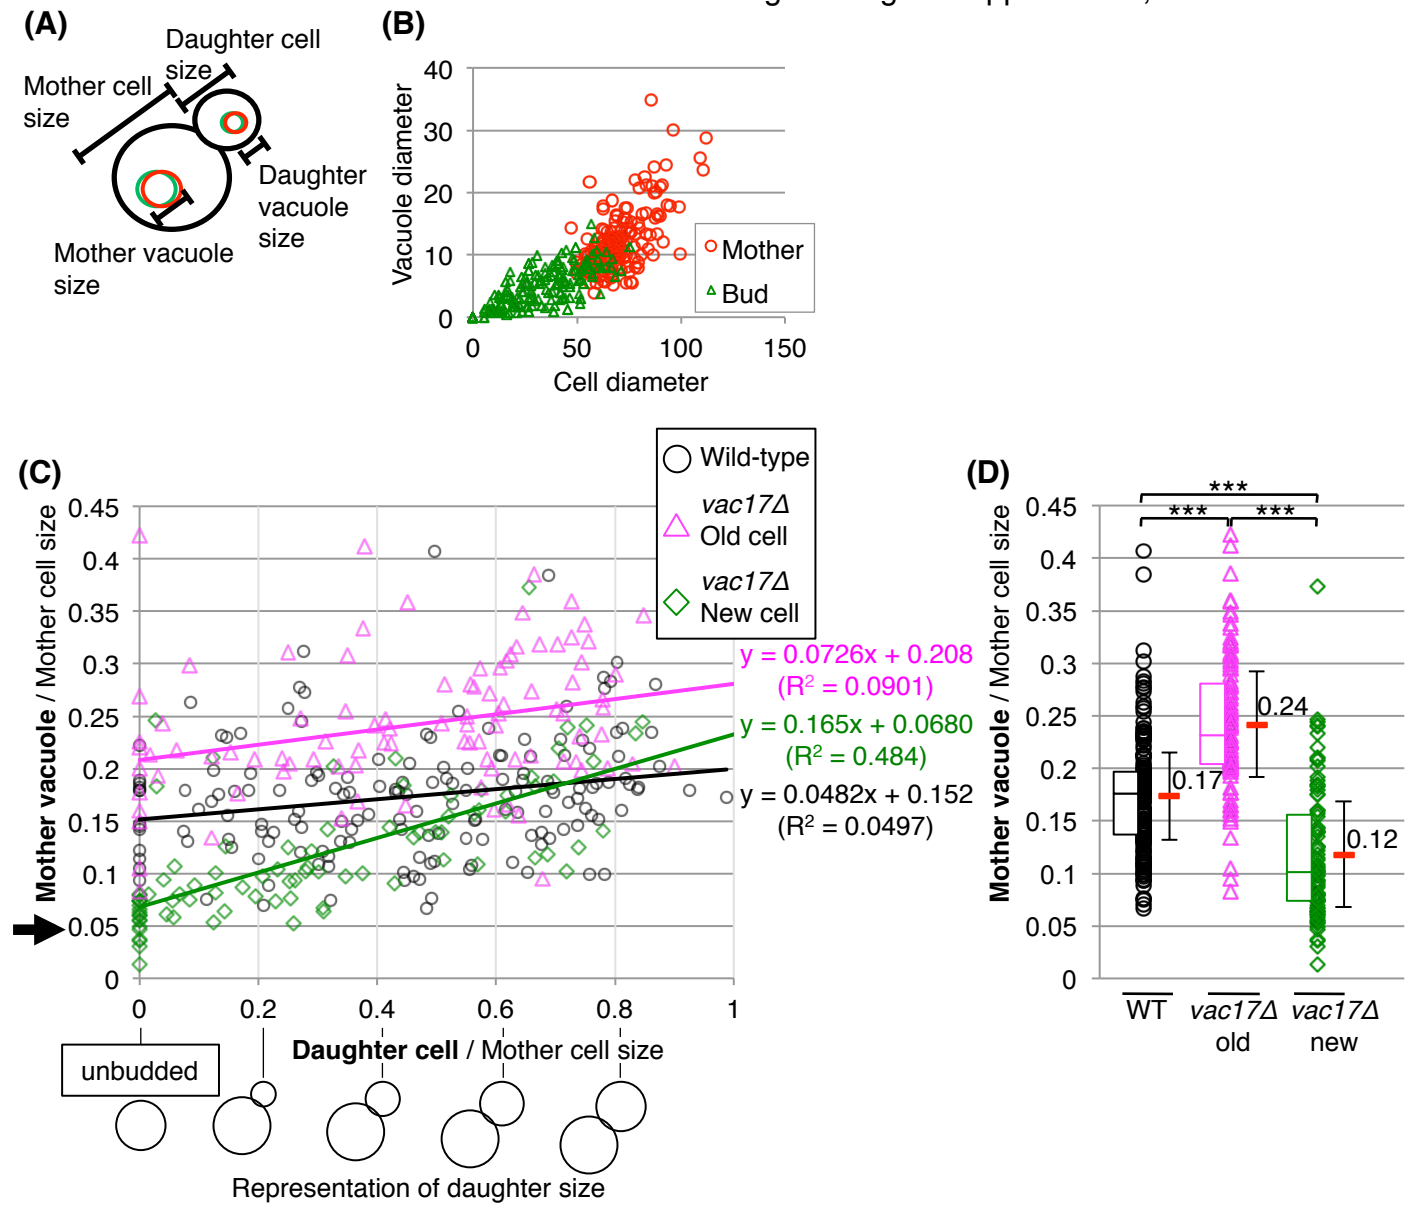

Supplement: supp [file elife-08160-supp-v1.zip]

Figure 3-figure supplement 3, Jin and Weisman

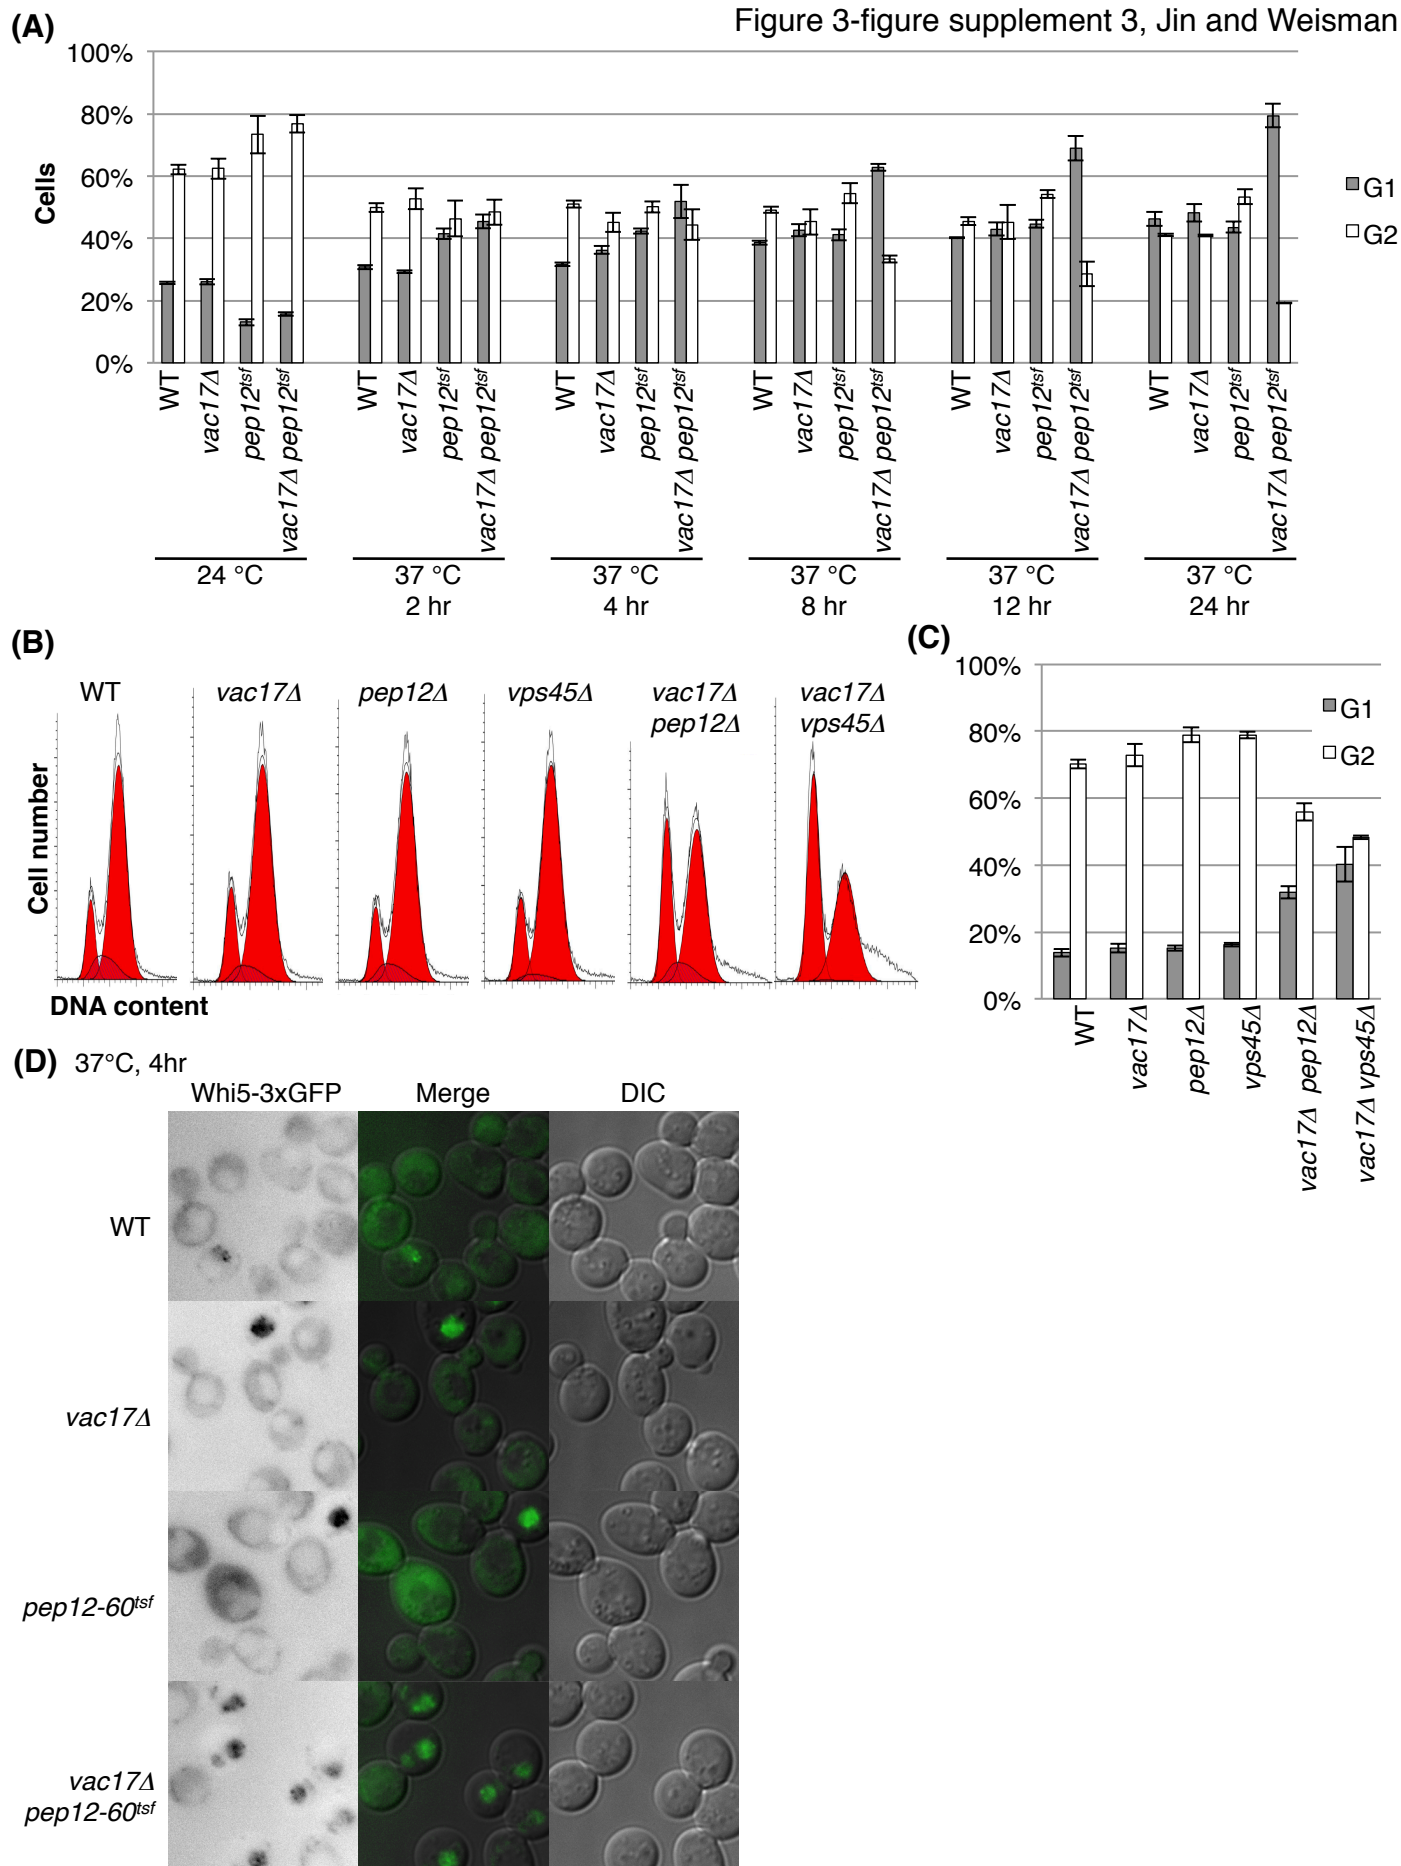

Supplement: supp [file elife-08160-supp-v1.zip]
